# Supplementary material for: A 2D graphical representation of the sequences of DNA based on triplets and its application
Source: Springer Nature journal article supplement (doi:10.1186/1687-4153-2014-1), 2014-01-02

# Opossum

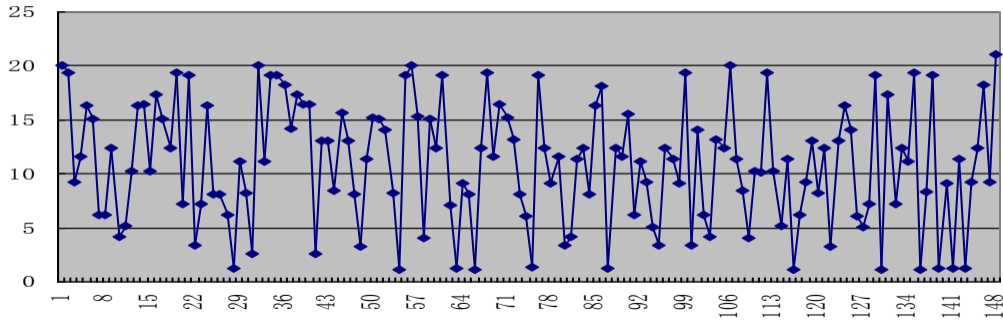

Supplement: 13637_2013_42_MOESM3_ESM.pdf [file 13637_2013_42_MOESM3_ESM.pdf]
